# Supplementary material
Source: MDPI journal article supplement (https://www.mdpi.com/1999-4907/14/4/685)
Supplement: s1 [file s1]

Supplemental information for **Effects of microbial communities on elevational gradient adaptation strategies of *Pinus yunnanensis* Franch. and *Pinus densata* Mast. in a mixed zone**

**Dejin Mu <sup>1,2</sup>, Junrong Tang <sup>1,2</sup>, Nianhui Cai <sup>1,2</sup>, Shi Chen <sup>1,2</sup>, Yingnian He <sup>1,2</sup>,  
Zijun Deng <sup>2</sup>, Yi Yang <sup>2</sup>, Dan Yang <sup>2</sup>, Yulan Xu <sup>1,2</sup>, Lin Chen <sup>1,2,\*</sup>**

1. Key Laboratory of National Forestry and Grassland Administration on Biodiversity Conservation in Southwest China, Southwest Forestry University, Kunming 650224, China

2. College of Forestry, Southwest Forestry University, Kunming 650224, China

\* Corresponding author: linchen@swfu.edu.cn

The following supporting information is available for this article:

**Supplemental Figure S1.** Workflow of sample collection.

**Supplemental Figure S2.** Sampling sites.

**Supplemental Figure S3.** Morphological features of pine needles at different elevations.

**Supplemental Figure S4.** Raincloud plot showing needle morphological features at different elevations.

**Supplemental Figure S5.** Rarefaction curves for different groups of samples.

**Supplemental Figure S6.** Composition and relative abundance of microbial communities at the phylum and genus levels.

**Supplemental Figure S7.** The distribution of samples at different altitudes on the PC1 axis analysed by PCoA.

**Supplemental Figure S8.** Variation in OTU abundance with altitudinal gradient.

**Supplemental Figure S9.** The different groups between the two types of pines at the OTU level and functions of bacteria at the KEGG 2 level.

**Supplemental Figure S10.** The different groups between rhizosphere soil and roots at the OTU level and functions of bacteria at the KEGG 2 level.

**Supplemental Figure S11.** RDA/CCA of the microbial communities of different pine types.

**Supplemental Figure S12.** RDA/CCA of the microbial communities of rhizosphere soil and roots.

**Supplementary Table S1.** Sampling site information.

**Supplementary Table S2.** Plant information for sampling sites at different elevations.

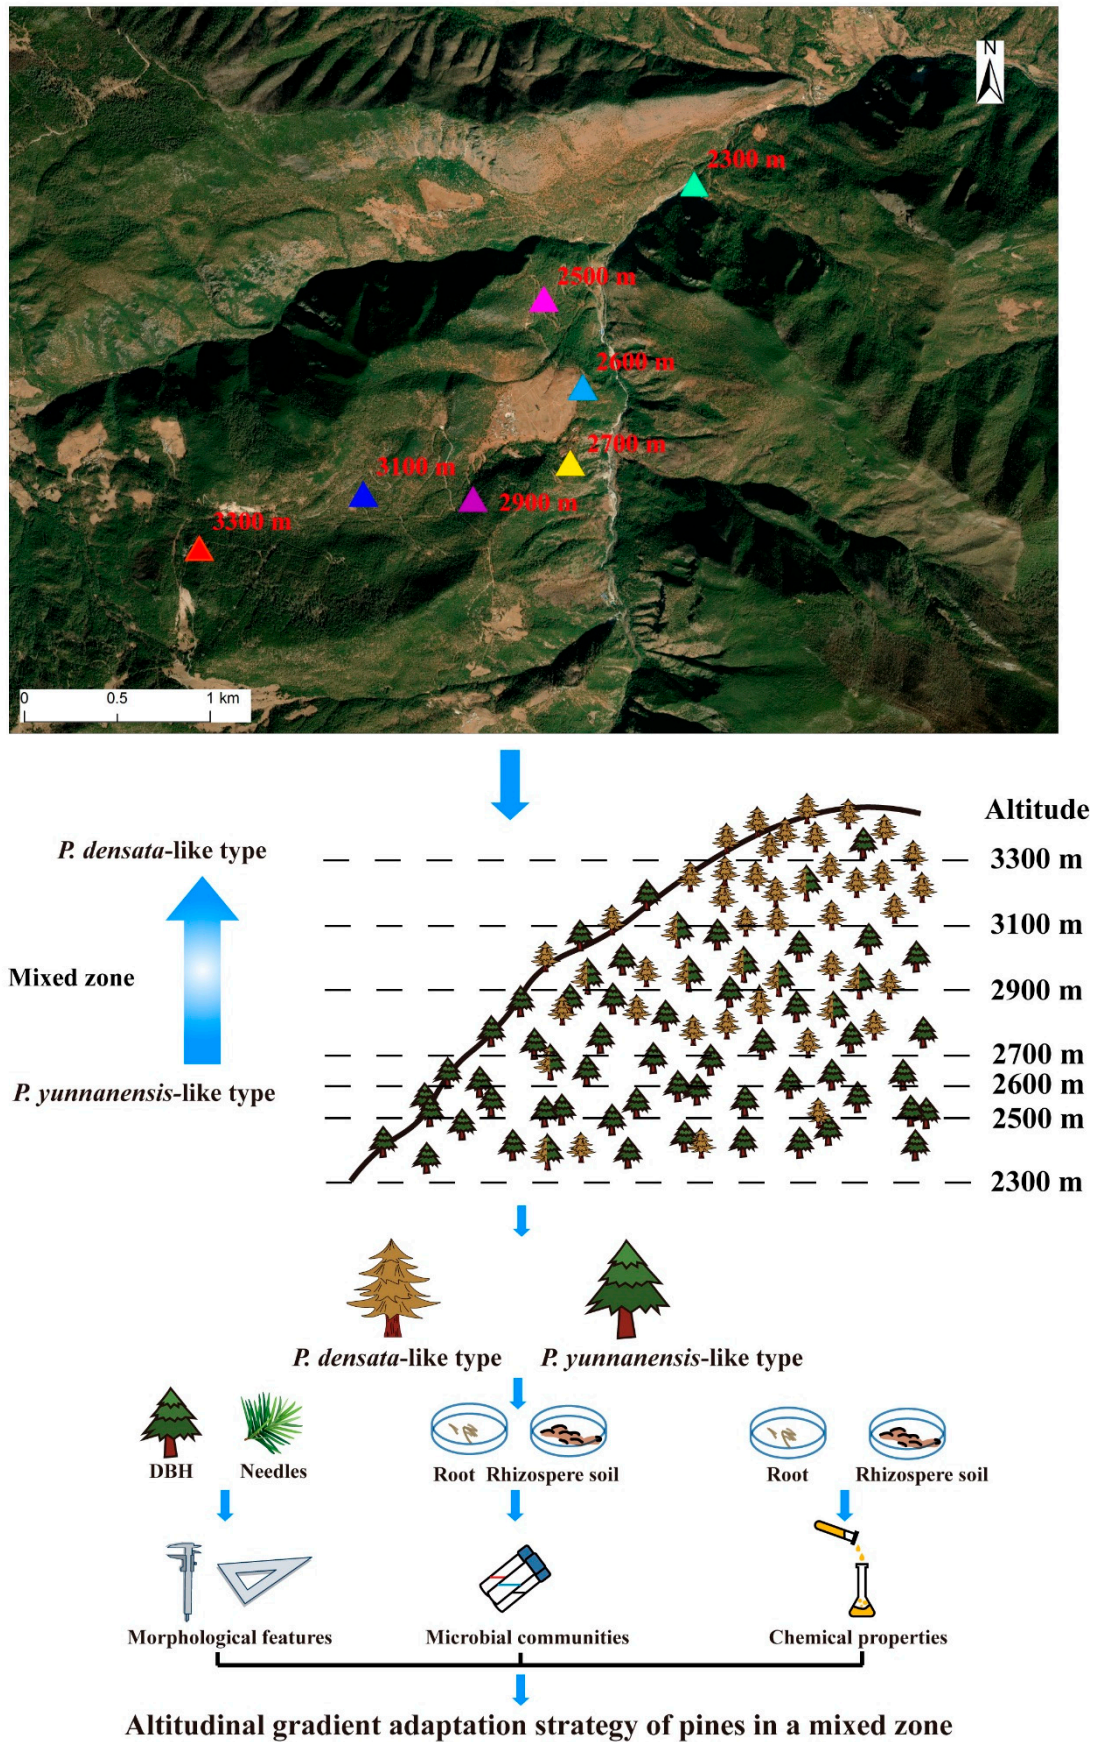

Supplemental Figure S1. Workflow of sample collection.



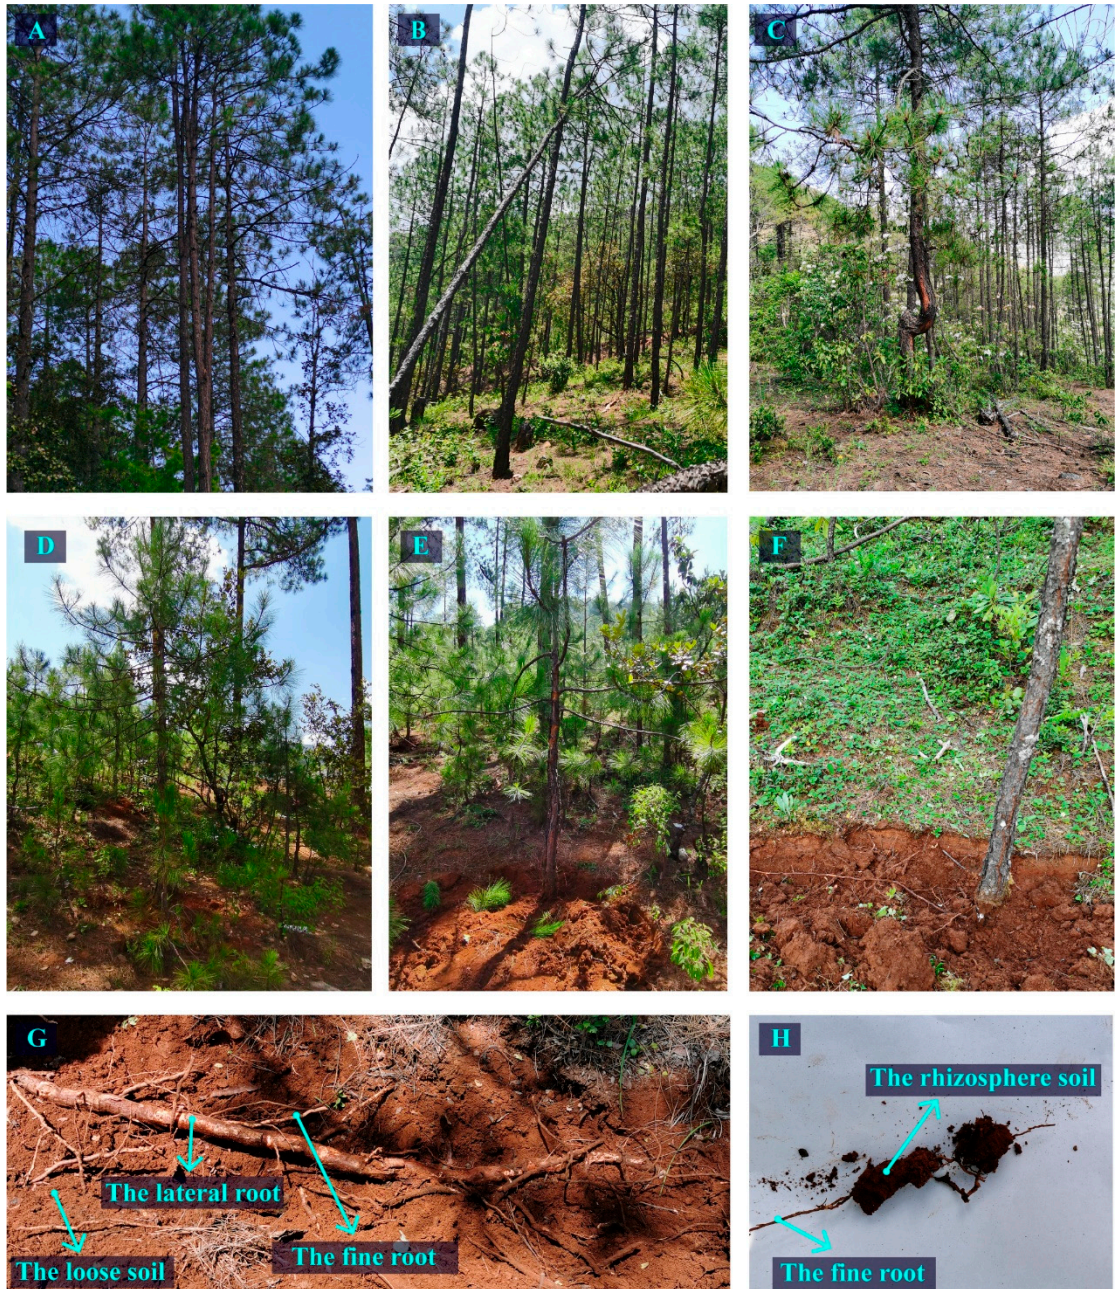

**Supplemental Figure S2. Sampling sites.** A, B, C: The pine forests used for sampling. D, E, F: The pine trees used to collect fine roots and rhizosphere soil. G, H: Fine roots and rhizosphere soil were collected.

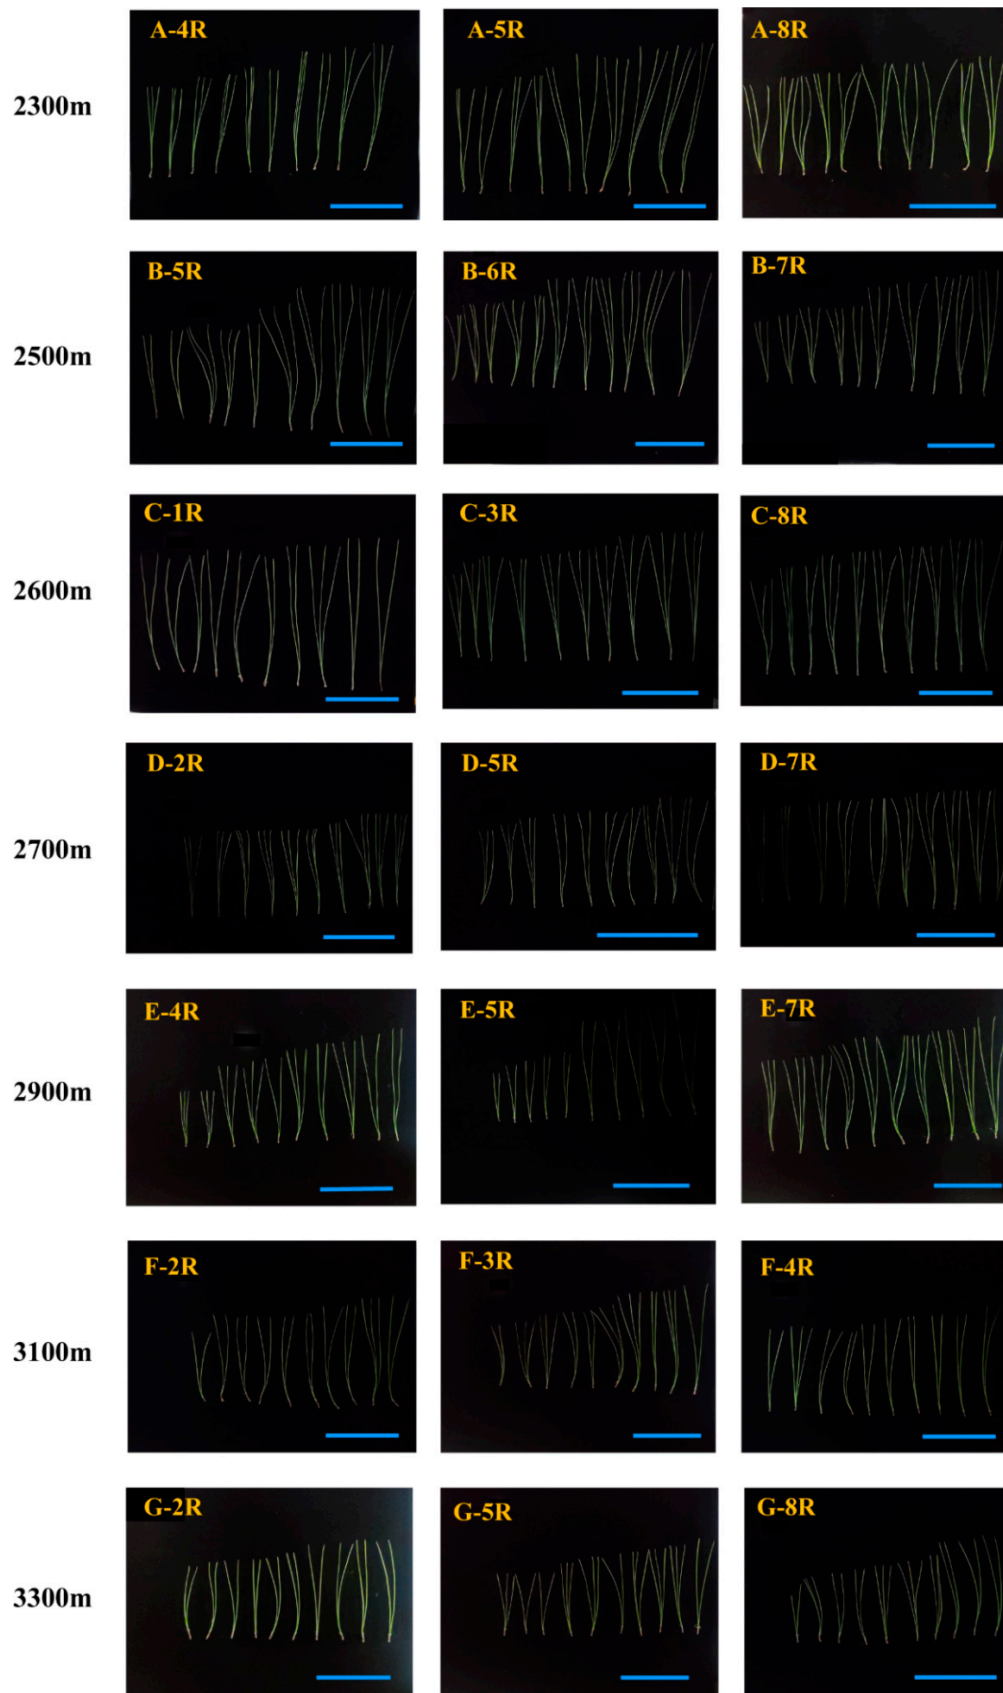

**Supplemental Figure S3. Morphological features of pine needles at different elevations.** The scale bars represent 10 cm.



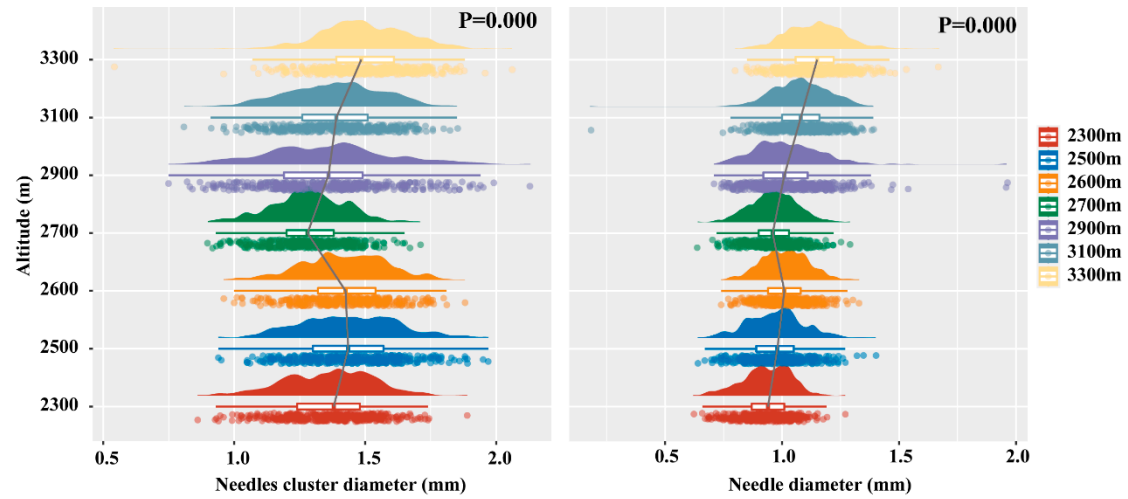

**Supplemental Figure S4. Raincloud plot showing needle morphological features at different elevations.** The half-violin diagram (cloud) shows the kernel density of the data distribution, and the scatter diagram (rain) shows the degree of dispersion. The raincloud plot also includes a box plot (umbrella) and lines (thunder) that link the medians of different groups.

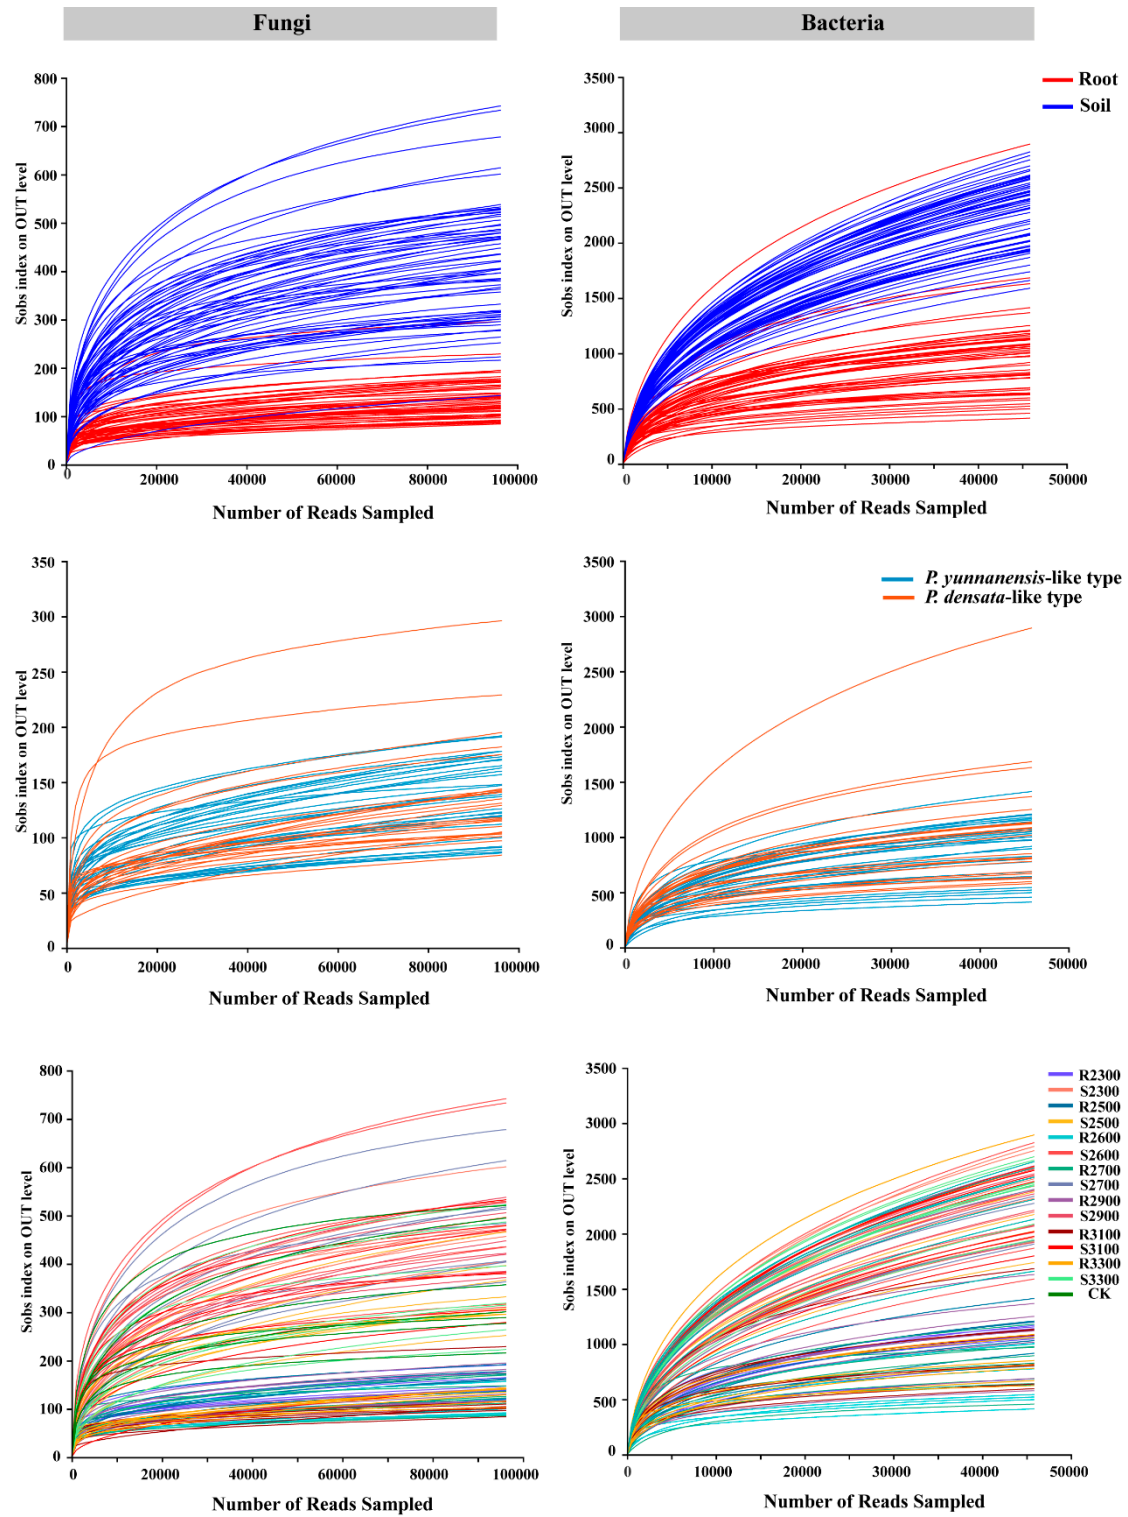

**Supplemental Figure S5. Rarefaction curves for different groups of samples.**

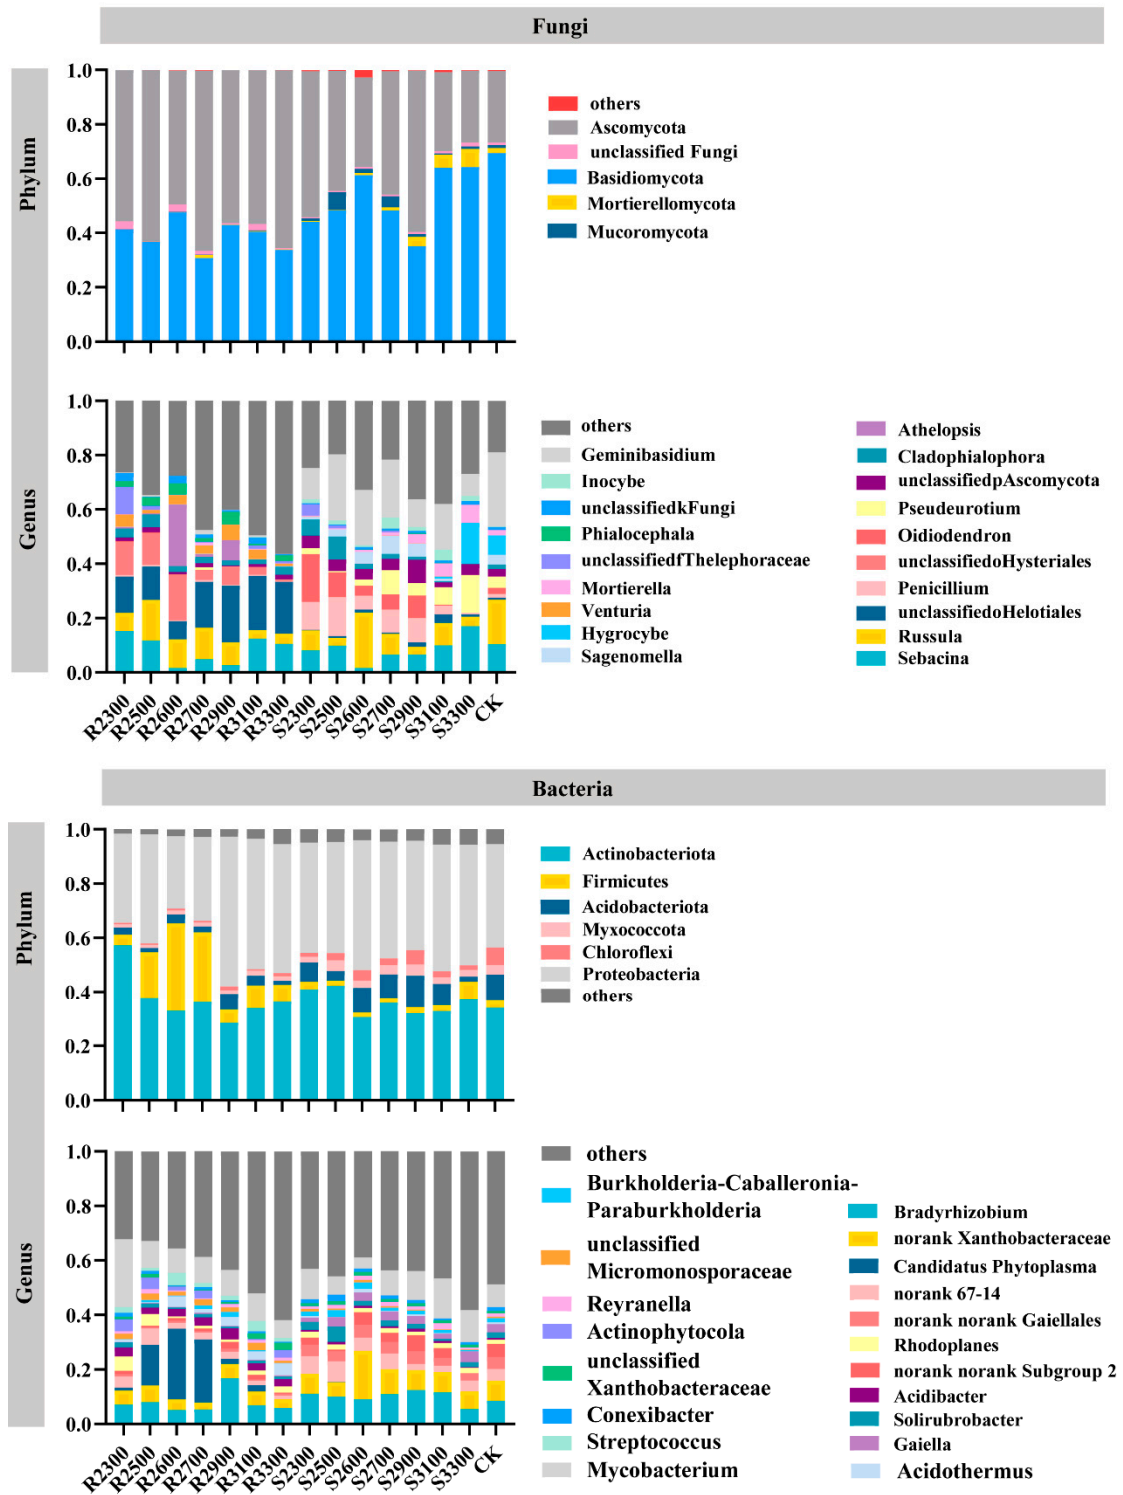

**Supplemental Figure S6. Composition and relative abundance of microbial communities at the phylum and genus levels.** Others represent the sum of the phyla or genera with a relative abundance less than 0.01.

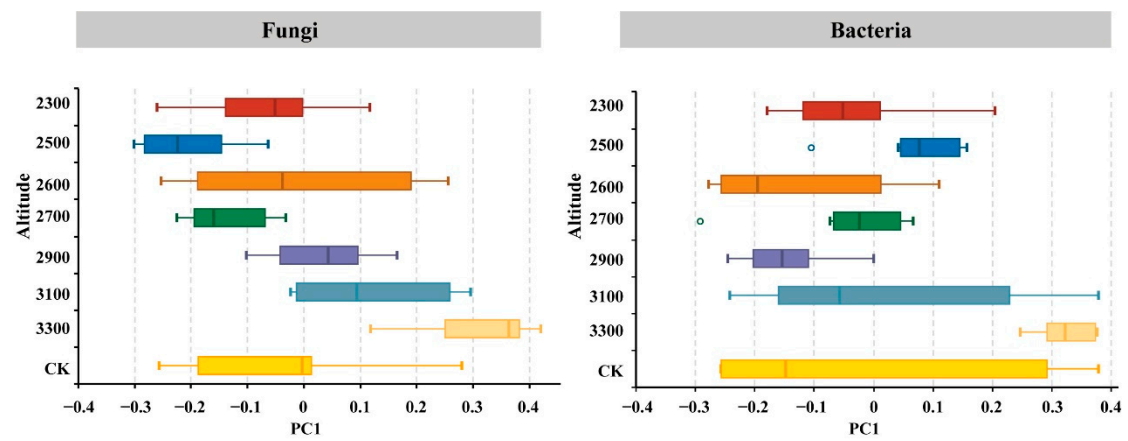

**Supplemental Figure S7. The distribution of samples at different elevations on the PC1 axis analysed by PCoA.**



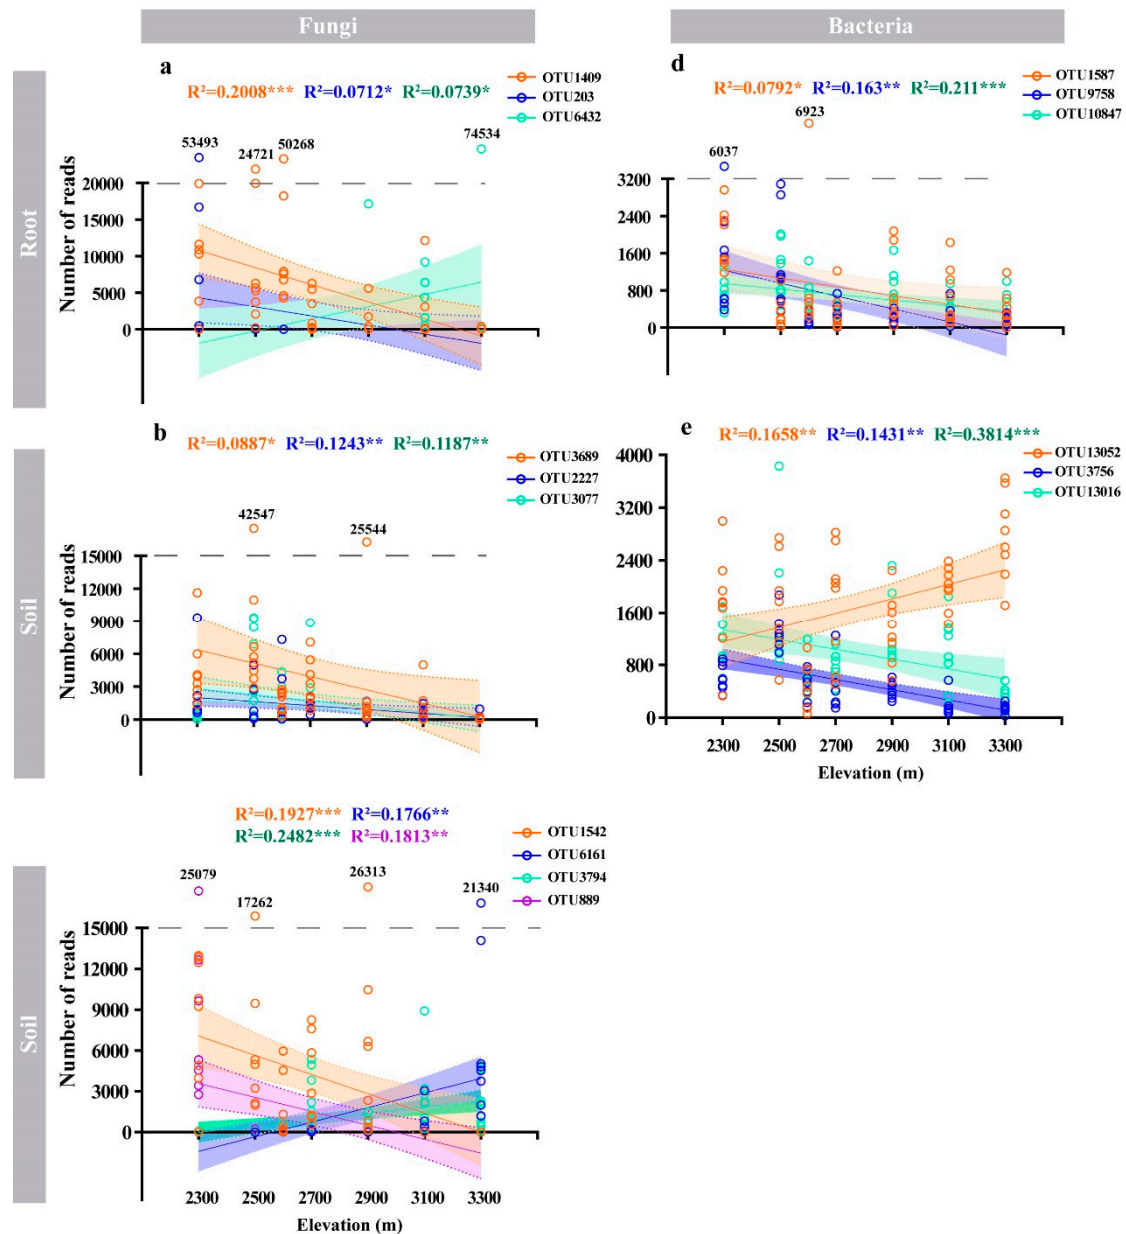

**Supplemental Figure S8. Variation in OTU abundance with altitudinal gradient.** The line indicates the linear regression fit, and the shaded band represents the 95% confidence level.  $R^2$  was employed to determine the models that fit the whole altitudinal gradient. Significant difference: \*  $P \leq 0.05$ , \*\*  $P \leq 0.01$ , \*\*\*  $P \leq 0.001$ .

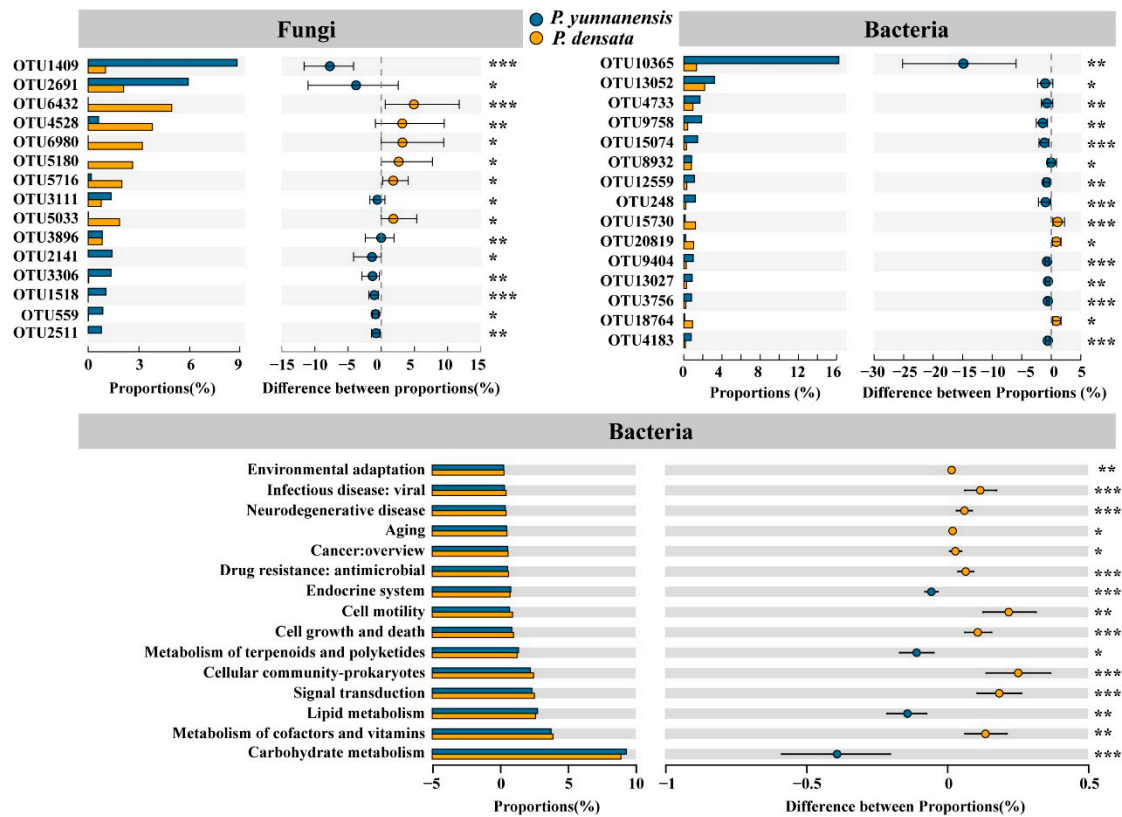

**Supplemental Figure S9. The different groups between the two types of pines at the OTU level and functions of bacteria at the KEGG 2 level.** Mann–Whitney U tests were used to evaluate differences in the abundance and functions of pine root endophytes. Significant difference: \*  $P \leq 0.05$ , \*\*  $P \leq 0.01$ , \*\*\*  $P \leq 0.001$ .

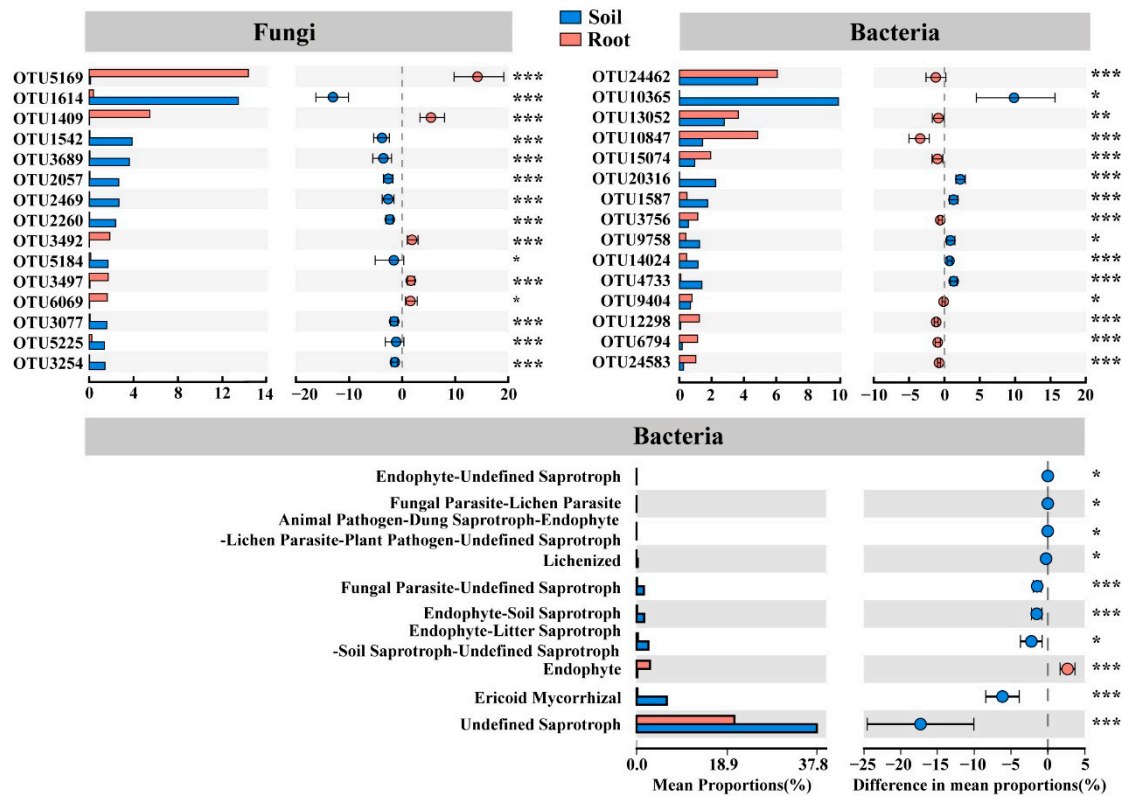

**Supplemental Figure S10. The different groups between rhizosphere soil and roots at the OTU level and functions of bacteria at the KEGG 2 level.** Mann–Whitney U tests were used to evaluate differences in the abundance and functions of pine root endophytes. Significant difference: \*  $P \leq 0.05$ , \*\*  $P \leq 0.01$ , \*\*\*  $P \leq 0.001$ .



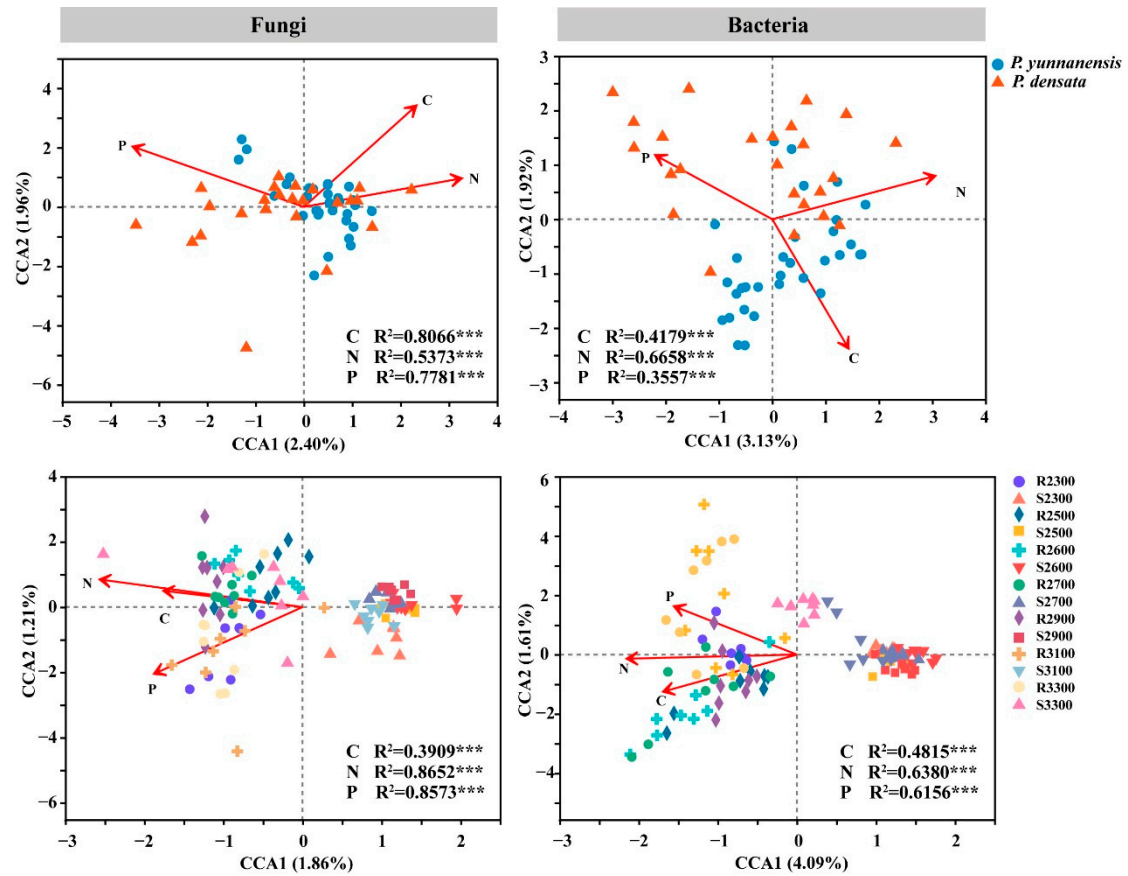

**Supplemental Figure S11. RDA/CCA of the microbial communities of different pine types.** Soil properties and plant nutrient contents with significant relationships ( $P < 0.05$ ) are indicated by red arrows, and the  $R^2$  values are shown. Significant difference:  $*** P \leq 0.001$ .

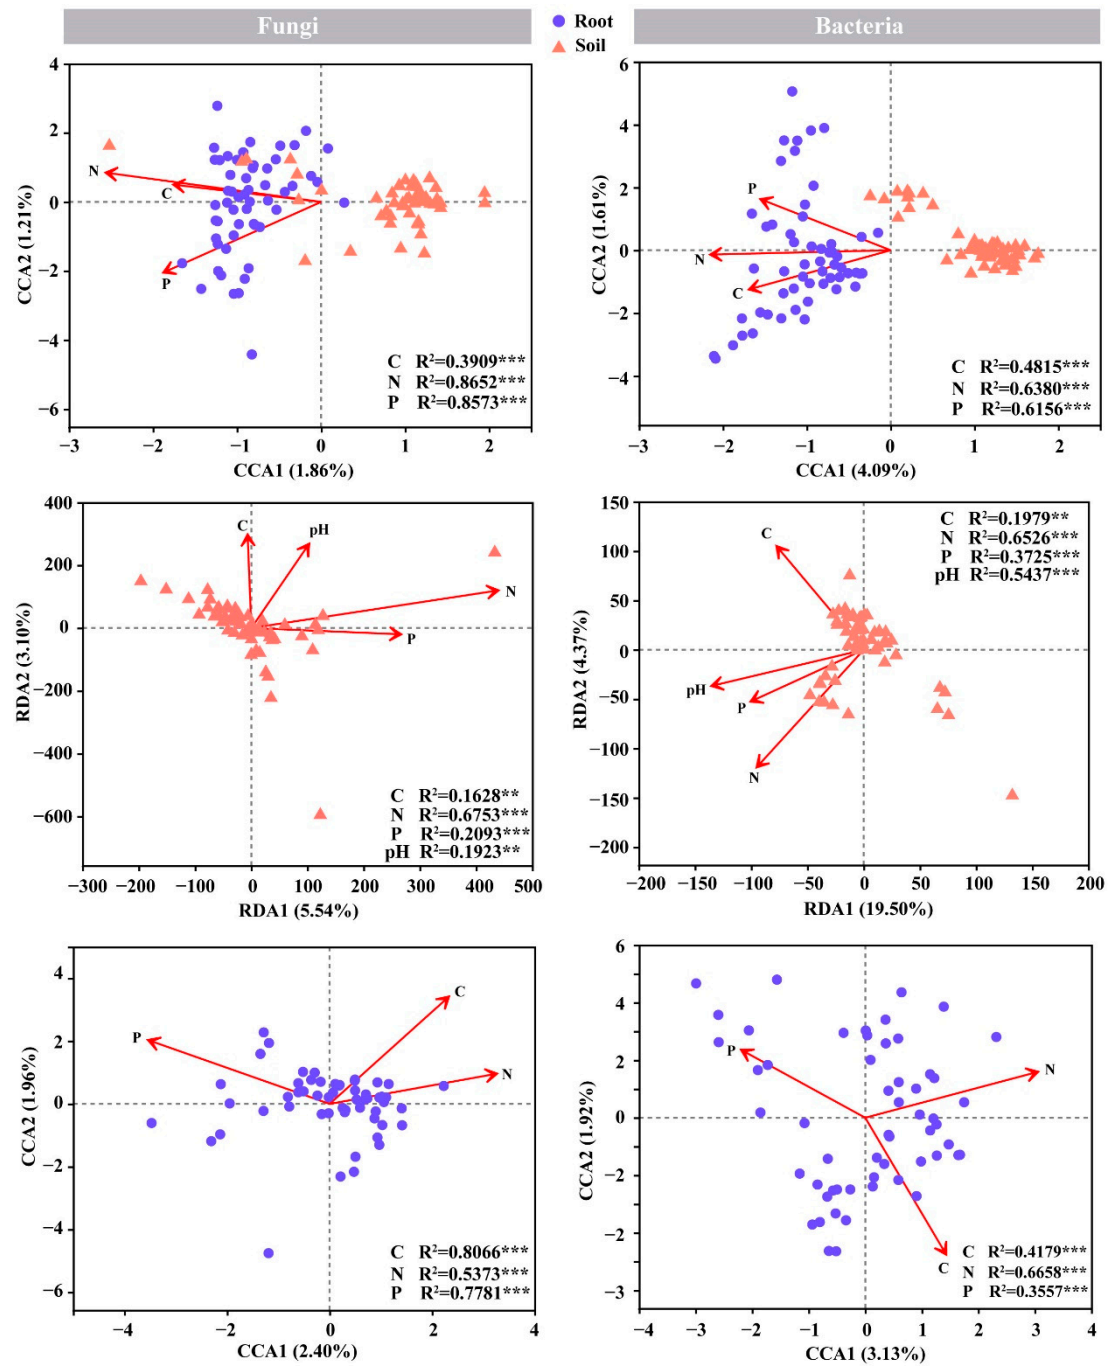

**Supplemental Figure S12. RDA/CCA of the microbial communities of rhizosphere soil and roots.** Soil properties and plant nutrient contents with significant relationships ( $P < 0.05$ ) are indicated by red arrows, and the  $R^2$  values are shown. Significant difference: \*\*  $P \leq 0.01$ , \*\*\*  $P \leq 0.001$ .

**Supplementary Table S1. Sampling site information.**

| Sampling sites | Longitude (E) | Latitude (N) | Elevation (m) |
|----------------|---------------|--------------|---------------|
| 1              | 100°5'38.91"  | 27°45'44.42" | 2300          |
| 2              | 100°4'51.76"  | 27°45'7.51"  | 2500          |
| 3              | 100°5'3.61"   | 27°44'39.69" | 2600          |
| 4              | 100°5'0.32"   | 27°44'15.94" | 2700          |
| 5              | 100°4'29.37"  | 27°44'4.31"  | 2900          |
| 6              | 100°3'55.51"  | 27°44'5.73"  | 3100          |
| 7              | 100°3'2.93"   | 27°43'49.49" | 3300          |

**Supplementary Table S2. Plant information for sampling sites at different elevations.**

| Species                             | Family       | Cover degree (%) |       |       |       |       |       |       |
|-------------------------------------|--------------|------------------|-------|-------|-------|-------|-------|-------|
|                                     |              | 2300m            | 2500m | 2600m | 2700m | 2900m | 3100m | 3300m |
| <i>Pinus yunnanensis</i> -like type | Pinaceae     | 50               | 50    | 30    | 70    | 0     | 0     | 0     |
| <i>Pinus densata</i> -like type     | Pinaceae     | 0                | 0     | 0     | 0     | 30    | 50    | 30    |
| <i>Quercus semecarpifolia</i>       | Fagaceae     | 1                | <1    | <1    | 10    | 0     | 0     | 30    |
| <i>Quercus aliena</i>               | Fagaceae     | 1                | 0     | 0     | 0     | 0     | 0     | 0     |
| <i>Coriaria nepalensis</i>          | Coriariaceae | <1               | <1    | 0     | 0     | 0     | 0     | 0     |
| <i>Rhododendron simsii</i>          | Ericaceae    | 1                | <1    | <1    | 5     | 0     | 40    | <1    |
| <i>Vaccinium fragile</i>            | Ericaceae    | 20               | 10    | 25    | 10    | 10    | 0     | 0     |
| <i>Indigofera tinctoria</i>         | Leguminosa   | 1                | 0     | 0     | 0     | 0     | 0     | 0     |
| <i>Campylotropis hirtella</i>       | Leguminosa   | 10               | 15    | 5     | 3     | 0     | 0     | 0     |
| <i>Quercus monimotricha</i>         | Fagaceae     | 0                | 0     | 0     | 0     | 5     | 5     | 0     |
| <i>Vaccinium</i> sp.                | Ericaceae    | 0                | 0     | 0     | 0     | <1    | 3     | <1    |
| <i>Pinus armandii</i>               | Pinaceae     | 0                | 0     | 0     | 0     | 0     | 0     | <1    |
